# Supplementary material for: Alkylsilane-functionalized perylenediimide derivatives with differential gas sensing properties
Source: Royal Society of Chemistry journal article supplement (doi:10.1039/c4tc02059f), 2014-11-04
Supplement: c4tc02059f1.pdf [file c4tc02059f1.pdf]

## Electronic Supplementary Information for

Alkylsilane functionalized perylenediimide derivatives with  
differential gas sensing properties

Yongwei Huang,<sup>a</sup> Weiguang Zhang,<sup>a</sup> Haiyan Zhai<sup>a</sup> and Chunli Li<sup>b</sup>

<sup>a</sup> Medical College, Henan University, Kaifeng 475004, China

<sup>b</sup>Key Laboratory for Special Functional Materials of Ministry of Education,  
Henan University, Kaifeng 475004, China

## 1. Synthesis of DMB, TMSA, TESA and TPSA

***N,N'*-bis(*n*-hexadecyl)-1,7-di(3,3-dimethyl-1-butynyl)perylene-3,4,9,10-tetracarboxyl diimide (DMB).** *N, N'*-bis(*n*-hexadecyl)-1,7-dibromoperylene-3,4,9,10-tetracarboxyldiimide (0.12 g, 0.13 mmol), 3,3-Dimethyl-butyne(0.70 g, 0.86 mmol), [Pd(PPh<sub>3</sub>)<sub>4</sub>] (0.02 g, 0.02 mmol) and CuI were stirred in a mixture of 15 mL of triethylamine and 15 mL of THF for 14 h at 53 °C under argon atmosphere. The mixture was cooled to room temperature and diluted with CH<sub>2</sub>Cl<sub>2</sub>. The organic layer was washed three times with water to neutral, dried with Na<sub>2</sub>SO<sub>4</sub>, and the solvent was evaporated under vacuum. The residue was purified by column chromatography on silica gel(petroleum ether/CH<sub>2</sub>Cl<sub>2</sub>,1:1) to yield the red product 0.11 g (86%). <sup>1</sup>H NMR (CDCl<sub>3</sub>, 400 MHz) δ(ppm): 0.85~0.89 (m,6 H),1.24~1.25 (m,70 H),1.57~1.58 (m, 4 H), 4.20~4.23 (m,4 H), 8.64~8.66(d, *J* = 8.0, 2 H), 8.76 (s, 2 H),10.12~10.14 (d, *J* = 8.0, 2 H), MS (MALDI-TOF): calcd for C<sub>68</sub>H<sub>90</sub>N<sub>2</sub>O<sub>4</sub>, 999.45 m/z, found 999.32. Anal. Calcd for C<sub>68</sub>H<sub>90</sub>N<sub>2</sub>O<sub>4</sub> : C, 81.72; H, 9.08; N, 2.80. Found: C, 81.56; H, 8.96; N, 2.91.

***N, N'*-bis(*n*-hexadecyl)-1,7-di(trimethylsilylethynyl)perylene-3,4,9,10-tetracarboxyldiimide (TMSA).** *N, N'*-bis(*n*-hexadecyl)-1,7-dibromoperylene-3,4,9,10-tetracarboxyldiimide (0.14 g, 0.14 mmol), trimethylsilylacetylene (0.08 g, 0.84 mmol), [Pd(PPh<sub>3</sub>)<sub>4</sub>](0.02 mg, 0.02 mmol) and CuI were stirred in a mixture of 15 mL of triethylamine and 15 mL of THF for 14 h at 53 °C under argon atmosphere. The mixture was cooled to room temperature and diluted with CH<sub>2</sub>Cl<sub>2</sub>. The organic layer was washed three times with water to neutral, dried with Na<sub>2</sub>SO<sub>4</sub>, and the solvent was evaporated under vacuum. The residue was purified by column chromatography on silica gel(petroleum ether/CH<sub>2</sub>Cl<sub>2</sub>, 1:1) to yield the red product 0.13 g (88%).<sup>1</sup>H NMR (CDCl<sub>3</sub>,400 MHz) δ(ppm): 0.85~0.89 (m, 6 H), 1.24~1.42 (m, 70 H),1.72~1.80 (m, 4 H),4.18~4.22 (m, 4 H), 8.57~8.59 (d, *J* = 8.0, 2 H),8.76 (s, 2 H), 10.12~10.14 (d, *J* = 8.0, 2 H), calcd for C<sub>66</sub>H<sub>90</sub>N<sub>2</sub>O<sub>4</sub> Si<sub>2</sub>, 1031.60 m/z, found 1031.33. Anal. Calcd for C<sub>66</sub>H<sub>90</sub>N<sub>2</sub>O<sub>4</sub> Si<sub>2</sub>: C, 76.84; H, 8.79; N, 2.72. Found: C, 76.55; H, 8.92; N, 2.75.

***N,N'*-bis(*n*-hexadecyl)-1,7-di(triethylsilylethynyl)perylene-3,4,9,10-tetracarboxyldiimide (TESA).** *N, N'*-bis(*n*-hexadecyl)-1,7-dibromoperylene-3,4,9,10-tetracarboxyldiimide(0.09 g, 0.1 mmol), (triethylsilyl)acetylene (0.08 g, 0.59 mmol), [Pd(PPh<sub>3</sub>)<sub>4</sub>] (0.01 g, 0.01 mmol), CuI were stirred in a mixture of 10 mL of triethylamine and 10 mL of THF for 14 h at 53 °C under argon atmosphere. The mixture was cooled to room temperature and diluted with CH<sub>2</sub>Cl<sub>2</sub>. The organic layer was washed three times with water to neutral, dried with Na<sub>2</sub>SO<sub>4</sub>, and the solvent was evaporated under vacuum. The residue was purified by column chromatography on silica gel (petroleum ether/CH<sub>2</sub>Cl<sub>2</sub>,1:1) to yield the red product 0.08 g (76%). <sup>1</sup>H NMR (CDCl<sub>3</sub>, 400 MHz) δ(ppm): 0.80~0.83 (m, 24 H),1.13~1.17 (m, 12 H), 1.24~1.28 (m, 52 H),1.72~1.80(m, 4 H), 4.18~4.22 (m, 4 H), 8.52~8.54 (d, *J* = 8.0, 2 H), 8.74 (s, 2 H), 10.17~10.19 (d, *J* = 8.0, 2 H), calcd

for  $C_{72}H_{102}N_2O_4 Si_2$ , 1115.76 m/z, found 1115.26. Anal. Calcd for  $C_{72}H_{102}N_2O_4 Si_2$ : C, 77.50; H, 9.21; N, 2.51. Found: C, 77.62; H, 9.18; N, 2.49.

***N,N'*-bis(*n*-hexadecyl)-1,7-di(triisopropylsilylethynyl)perylene-3,4,9,10-tetracarboxydiimide (TPSA).** *N,N'*-bis(*n*-hexadecyl)-1,7-dibromoperylene-3,4,9,10-tetracarboxyl-diimide (0.10 g, 0.10 mmol), (triisopropylsilyl)acetylene (0.09 g, 0.48 mmol),  $[Pd(PPh_3)_4]$  (0.01 g, 0.01 mmol), CuI were stirred in a mixture of 10 mL of triethylamine and 10 mL of THF for 14 h at 53 °C under argon atmosphere. The mix was cooled to room temperature and diluted with  $CH_2Cl_2$ . The organic layer was washed three times with water to neutral, dried with  $Na_2SO_4$ , and the solvent was evaporated under vacuum. The residue was purified by column chromatography on silica gel(petroleum ether/ $CH_2Cl_2$ , 1:1) to yield the red product 0.09 g (78%).  $^1H$  NMR ( $CDCl_3$ , 400 MHz)  $\delta$ (ppm): 1.22~1.28 (m, 94 H), 1.59~1.62 (m, 4 H), 1.75~1.79 (m, 6 H), 4.19~4.23 (m, 4 H), 8.60~8.63 (d,  $J = 8.4$ , 2 H), 8.82 (s, 2 H), 10.33~10.35 (d,  $J = 8.0$ , 2 H). calcd for  $C_{78}H_{114}N_2O_4 Si_2$ , 1199.92 m/z, found 1199.91. Anal. Calcd for  $C_{78}H_{114}N_2O_4 Si_2$ : C, 78.02; H, 9.58; N, 2.33. Found: C, 78.00; H, 9.65; N, 2.36.

## 2. Supporting Figures

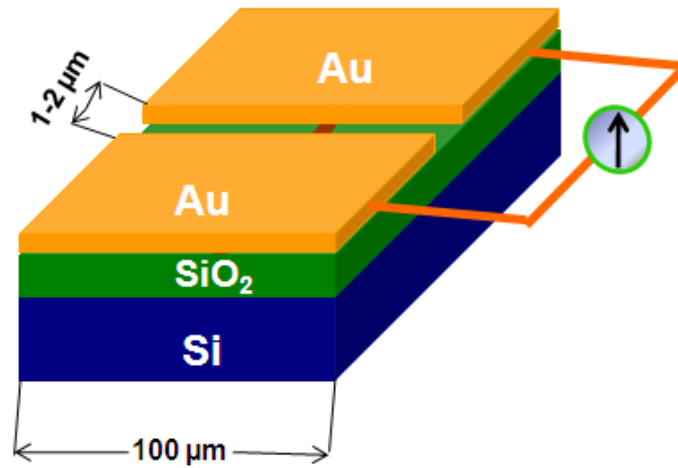

**Fig. S1** Schematic image of gas sensing device with length and width of channel.

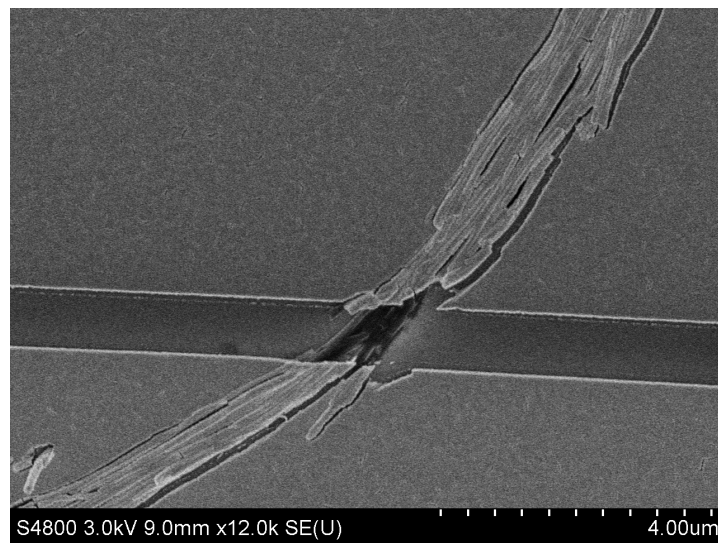

**Fig. S2** SEM image of DMB gas sensing device.

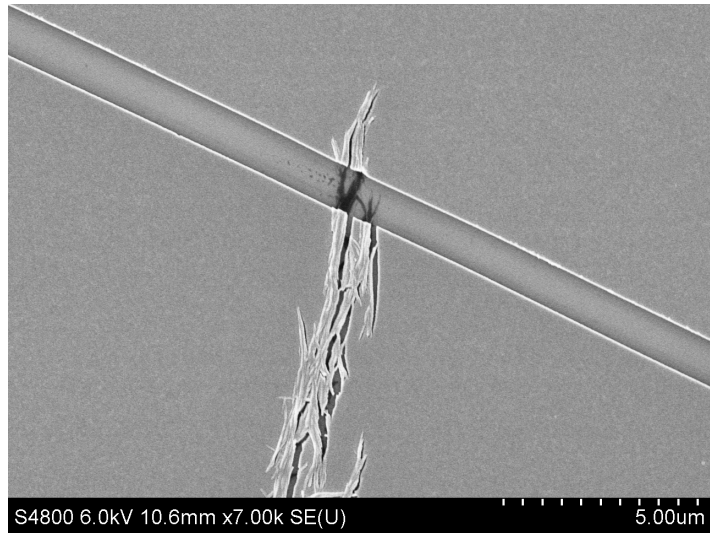

**Fig. S3** SEM image of TMSA gas sensing device.

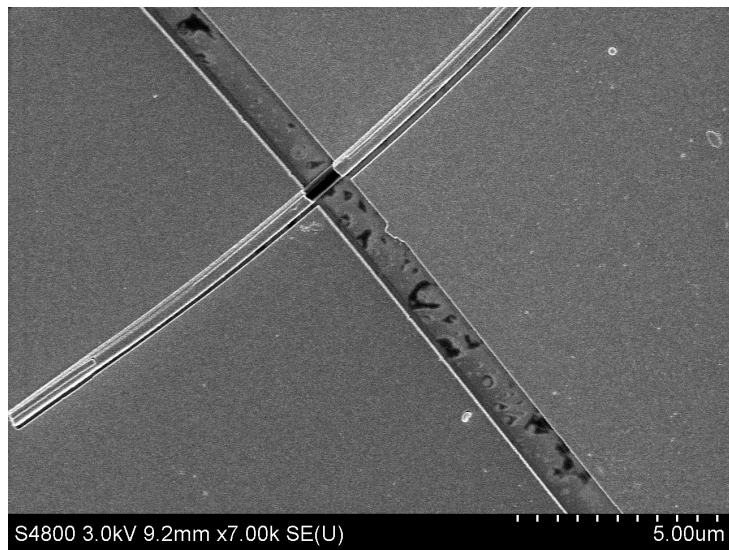

**Fig. S4** SEM image of TESA gas sensing device.

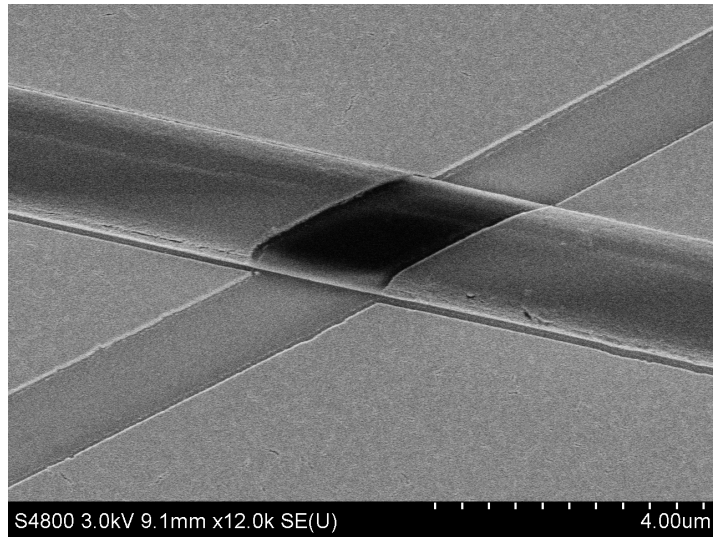

**Fig. S5** SEM image of TPSA gas sensing device.
